# Supplementary material for: The UL13 and US3 Protein Kinases of Herpes Simplex Virus 1 Cooperate to Promote the Assembly and Release of Mature, Infectious Virions
Source: PubMed Central journal article supplement (PMC4482649; doi:10.1371/journal.pone.0131420), 2015-06-26
Supplement: pone.0131420.s001.pdf [file pone.0131420.s001.pdf]

| <b>Primer/probe</b>                       | <b>Name</b> | <b>Application</b> |
|-------------------------------------------|-------------|--------------------|
| CAGGTACCTACGTACACTCCAACC                  | UL13_1      | UL13 mutagenesis   |
| CTTGGATCCATATGGGATCTCGAGGGTCGTGTAG        | UL13_2      | UL13 mutagenesis   |
| CTTGGATCCACGCGTGTACCCTCAACTCCAAC          | UL13_3      | UL13 mutagenesis   |
| CTATCTAGAGAAGTCCGGCGACAGCTG               | UL13_4      | UL13 mutagenesis   |
| GCGACCTGGCCGAAGGATGGATGAG                 | a           | PCR test (Fig. 1)  |
| CTTGTACAGCTCGTCCATG                       | b           | PCR test (Fig. 1)  |
| GGGAGGTCTATATAAGCAGAGCT                   | c           | PCR test (Fig. 1)  |
| CCGGGTGAACGCTGATTCTCACGAC                 | d           | PCR test (Fig. 1)  |
| GTCCGTTGTGTTGGCC                          | e           | PCR test (Fig. 1)  |
| CGGTCTCTCTCGAGATACATTGATGAGTTTG           | f           | PCR test (Fig. 1)  |
| AATGGTGAGCAAGGGCG                         | g           | PCR test (Fig. 1)  |
| CAGCGACAGGACCTAG                          | h           | PCR test (Fig. 1)  |
| AGGCCCCCAGAGACTTGTTGTAGGAGCATTCCGGTGTACTC | US6 probe   | Dot-blot           |
| CCGTGGGGGTTGGAGTGTACGTAGGATGCGAGCCAATCCT  | UL13 probe  | Southern blot      |
| TCCTCTATGGGGTAGTCCTGGTTTCCGTACATCTGGGCA   | US3 probe   | Southern blot      |
