# Supplementary material for: The UL13 and US3 Protein Kinases of Herpes Simplex Virus 1 Cooperate to Promote the Assembly and Release of Mature, Infectious Virions
Source: PubMed Central journal article supplement (PMC4482649; doi:10.1371/journal.pone.0131420), 2015-06-26

**A**

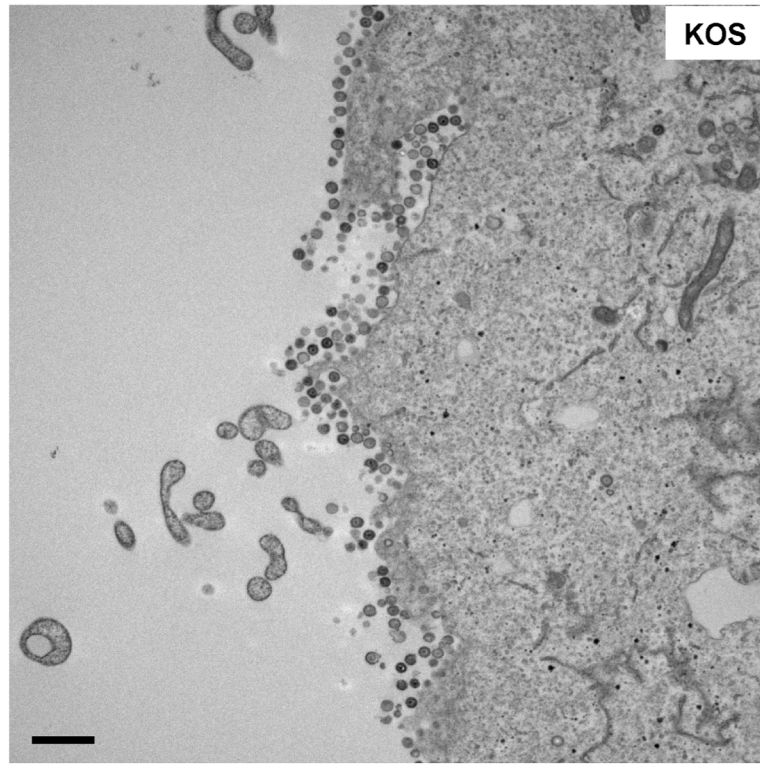

**B**

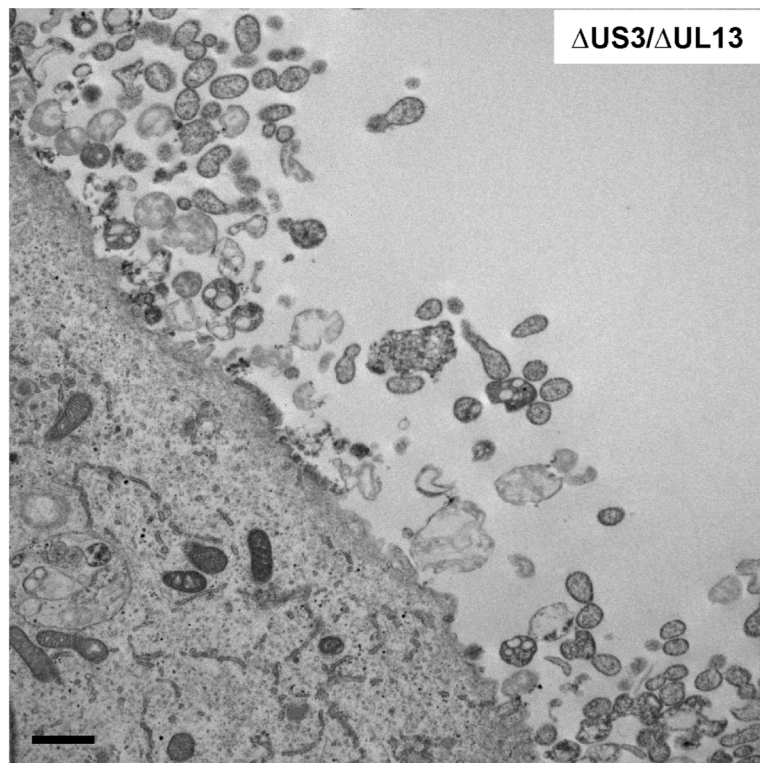

Supplement: pone.0131420.s002.pdf [file pone.0131420.s002.pdf]
